# Supplementary material for: EPHA5 mutations predict survival after immunotherapy in lung adenocarcinoma
Source: PubMed Central journal article supplement (PMC7834994; doi:10.18632/aging.202169), 2020-12-03
Supplement: aging-13-202169-s001.pdf [file aging-13-202169-s001.pdf]

**SUPPLEMENTARY FIGURE**

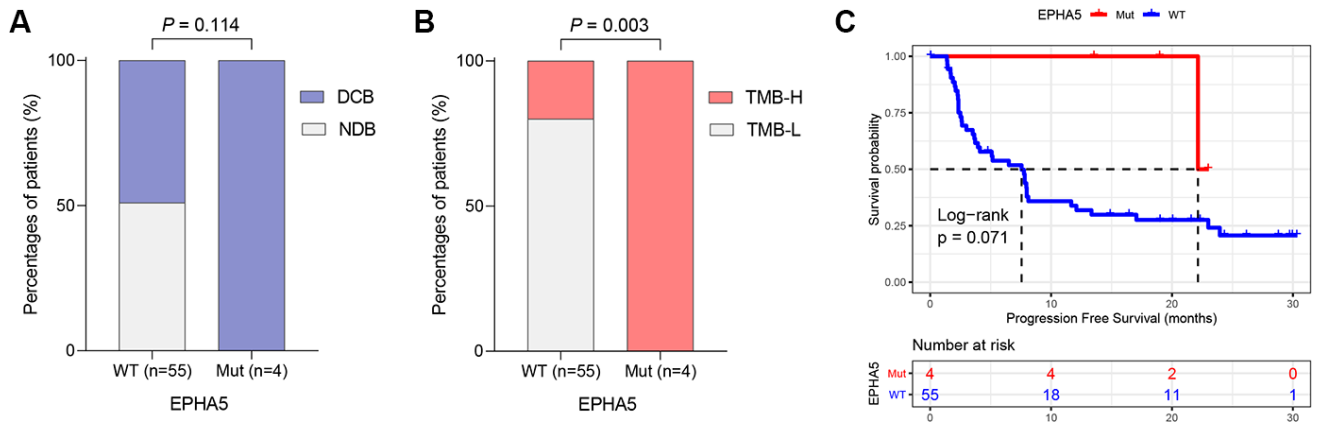

**Supplementary Figure 1. Non-squamous NSCLC patients with EPHA5 mutation had better clinical response and outcome after ICI therapy.** All patients with EPHA5 mutations (A) presented durable clinical benefit to ICIs, and (B) had high TMB. (C) The EPHA5-Mut group tended to have longer PFS than the EPHA5-WT group.
